# Supplementary material
Source: PubMed Central journal article supplement (PMC4162743)
Supplement: NIHMS623287-supplement-supplement_1.pdf [file NIHMS623287-supplement-supplement_1.pdf]

Supplementary material:  
Figure 3 Timeline of study

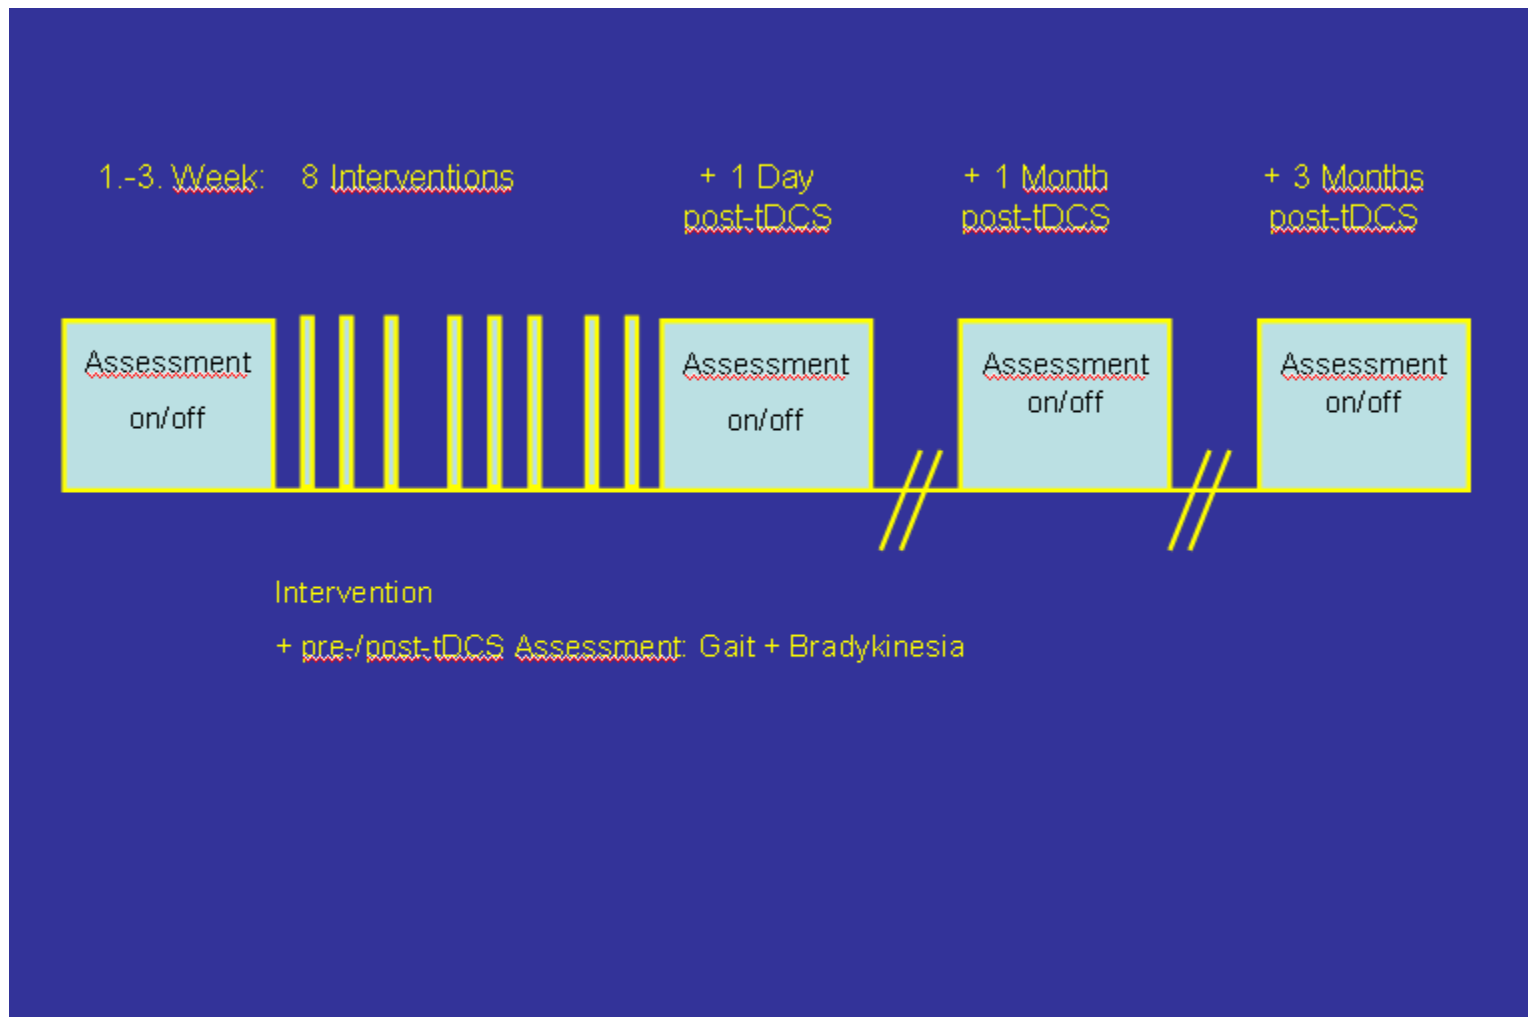

## Supplementary Tables:

Table 4

Walking time across sessions comparing tDCS and sham intervention

| Session | **Estimate | *Standard Error | *DF | *Pr >  t | *95% confidence interval |
|---------|------------|-----------------|-----|----------|--------------------------|
| 1       | 0.6061     | 0.2433          | 159 | 0.0137   | (0.1257, 1.0866)         |
| 2       | 0.2956     | 0.6420          | 159 | 0.6458   | (-0.9723, 1.5635)        |
| 3       | -0.3292    | 0.2296          | 159 | 0.1535   | (-0.7826, 0.1242)        |
| 4       | -0.4213    | 0.1642          | 159 | 0.0112   | (-0.7456, -0.09639)      |
| 5       | 0.2771     | 0.3203          | 159 | 0.3883   | (-0.3555, 0.9098)        |
| 6       | 0.05016    | 0.2230          | 159 | 0.8223   | (-0.3902, 0.4905)        |
| 7       | -0.03984   | 0.2173          | 159 | 0.8547   | (-0.4690, 0.3893)        |
| 8       | -0.3528    | 0.1837          | 159 | 0.0566   | (-0.7156, 0.01004)       |

\*\* : These are mixed models-based (see statistical analysis section for details) estimates for the difference in walking time between sham and tDCS intervention after each session.

\* : These are obtained using mixed models.

Table 5

Sequential hand and arm movement time across sessions comparing tDCS and sham intervention

| Session | **Estimate | *Standard Error | *DF | *Pr >  t | *95% confidence interval |
|---------|------------|-----------------|-----|----------|--------------------------|
| 1       | 1.2771     | 0.6016          | 159 | 0.0353   | (0.08889, 2.4654)        |
| 2       | 1.6663     | 0.5832          | 159 | 0.0048   | (0.5145, 2.8181)         |
| 3       | 0.6689     | 0.5306          | 159 | 0.2093   | (-0.3791, 1.7169)        |
| 4       | 0.4639     | 0.4960          | 159 | 0.3511   | (-0.5157, 1.4436)        |
| 5       | 0.9517     | 0.5988          | 159 | 0.1140   | (-0.2310, 2.1343)        |
| 6       | 0.9685     | 0.4524          | 159 | 0.0338   | (0.07496, 1.8620)        |
| 7       | 0.7614     | 0.5283          | 159 | 0.1515   | (-0.2820, 1.8048)        |
| 8       | 0.7761     | 0.4148          | 159 | 0.0632   | (-0.04318, 1.5955)       |

\*\* : These are mixed models-based (see statistical analysis section for details) estimates for the difference in walking time between sham and tDCS intervention after each session.

\* : These are obtained using mixed models.
